# Supplementary material
Source: PubMed Central journal article supplement (PMC5572823)

Litter 35 Embryo 4

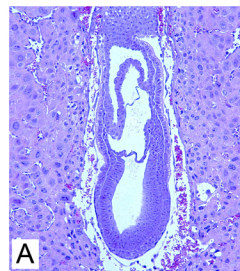

Litter 35 Embryo 7

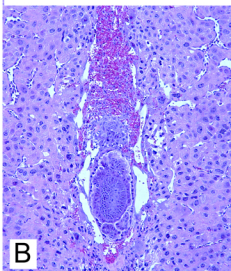

Litter 35 Embryo 4

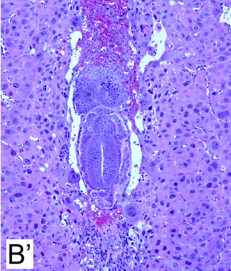

Litter 35 Embryo 7

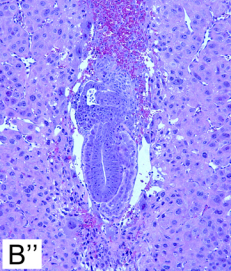

Litter 35 Embryo 3

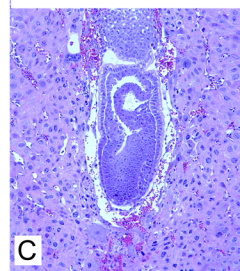

Litter 35 Embryo 2

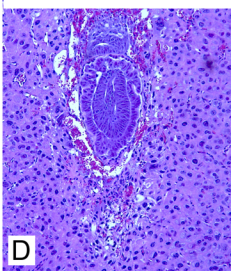

Litter 36 Embryo 7

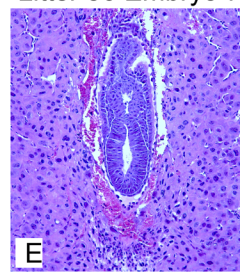

Litter 36 Embryo 4

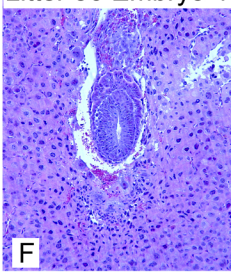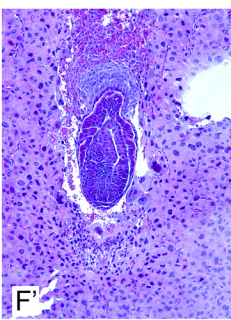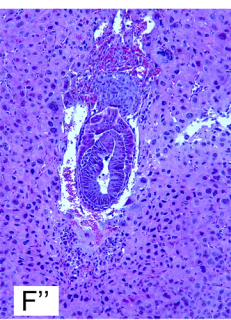

Litter 36 Embryo 2

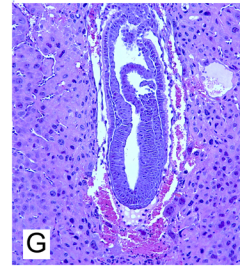

Litter 36 Embryo 5

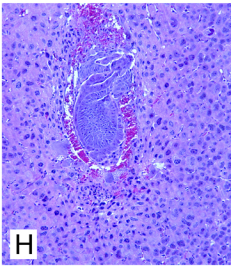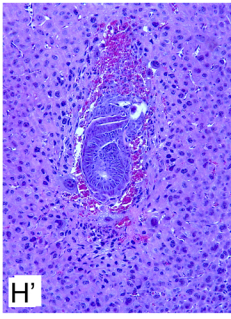

Litter 39 Embryo 6

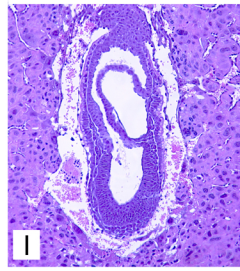

Litter 39 Embryo 5

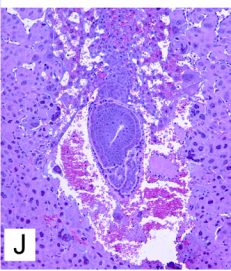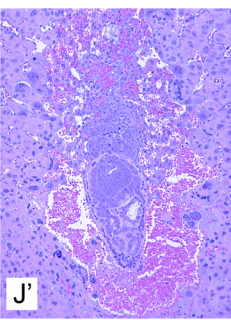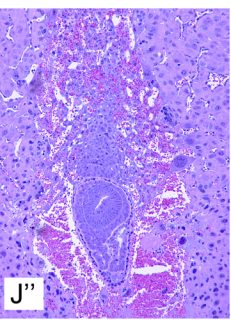

Litter 39 Embryo 4

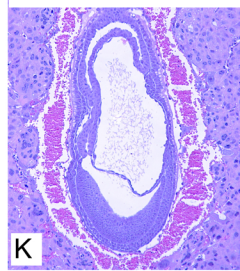

Litter 39 Embryo 7

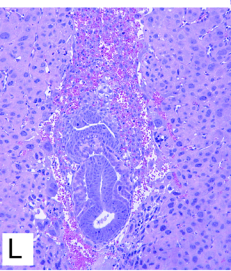

Litter 39 Embryo 2

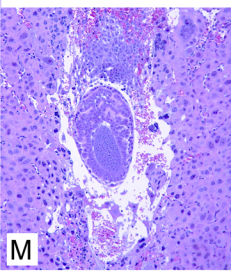

Supplement: NIHMS877625-supplement-Suppl_Fig_4.pdf [file NIHMS877625-supplement-Suppl_Fig_4.pdf]
