# Supplementary material
Source: PubMed Central journal article supplement (PMC5572823)

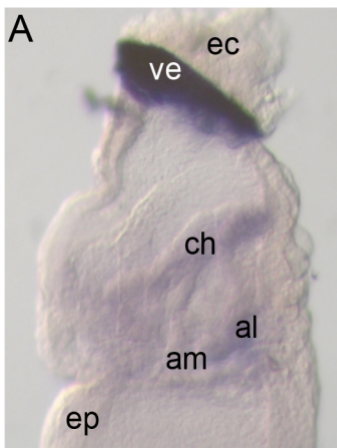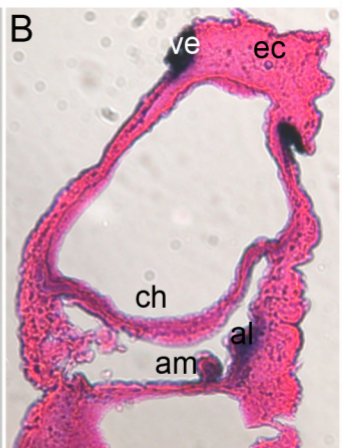

Supplement: NIHMS877625-supplement-Suppl_Fig_5.pdf [file NIHMS877625-supplement-Suppl_Fig_5.pdf]
